# Supplementary material for: A magnetic nanoparticle-based aptasensor for selective and sensitive determination of lysozyme with strongly scattering silver nanoparticles
Source: Royal Society of Chemistry journal article supplement (doi:10.1039/c6an00489j), 2016-01-01
Supplement: c6an00489j1.pdf [file c6an00489j1.pdf]

***Supplementary Information***

***for***

**Magnetic nanoparticle-based aptasensor for selective and sensitive determination of lysozyme with strongly scattering silver nanoparticles**

Chun Mei Li,<sup>a</sup> Lei Zhan,<sup>a</sup> Lin Ling Zheng,<sup>a</sup> Yuan Fang Li,<sup>b</sup> and Cheng Zhi Huang<sup>\*a,b</sup>

<sup>a</sup> Key Laboratory of Luminescent and Real-Time Analytical Chemistry (Southwest University), Ministry of Education, College of Pharmaceutical Sciences, Southwest University, Chongqing 400715, PR China

<sup>b</sup> Chongqing Key Laboratory of Biomedical Analysis (Southwest University), Chongqing Science & Technology Commission, College of Chemistry and Chemical Engineering, Southwest University, Chongqing 400715, PR China

E-mail: [chengzhi@swu.edu.cn](mailto:chengzhi@swu.edu.cn); Fax: +86-23-68367257; Tel: +86-23-68254659.

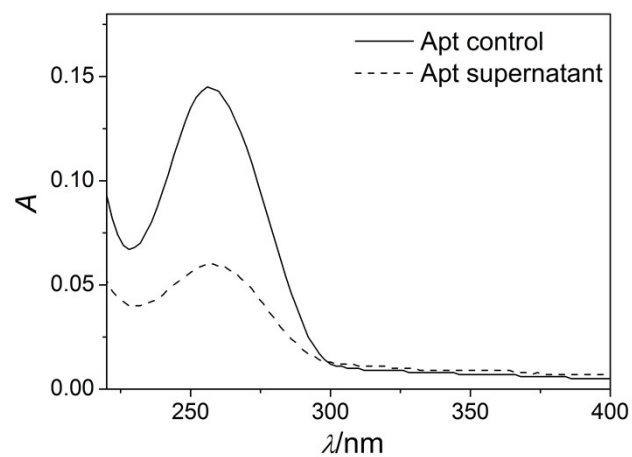

**Fig. S1** Comparison of the UV-Vis absorption spectra of aptamer at 260nm before (Apt control) and after (Apt supernatant) conjugation with magnetic nanoparticles.

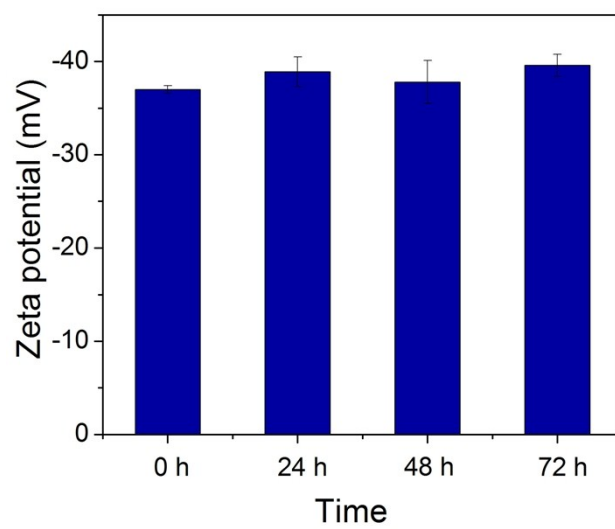

**Fig. S2** Zeta potential of MNPs-apt obtained after different time (0, 24 h, 48 h, 72 h).

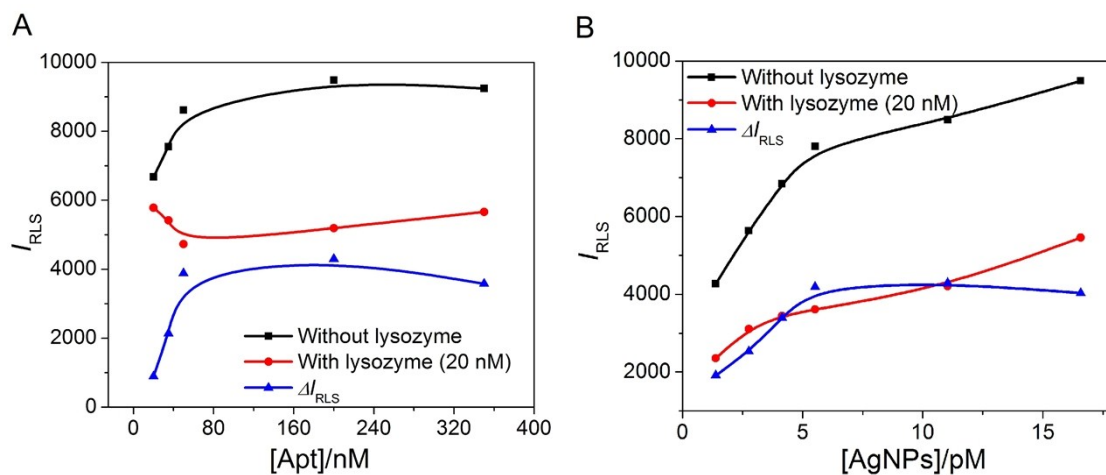

**Fig. S3** Optimization of the reaction concentrations for lysozyme detection. (A) Aptamer concentration was optimized. Concentrations: Lysozyme: 20 nM; AgNPs, 11.04 pM. (B) AgNPs concentration was optimized. Concentrations: Lysozyme: 20 nM; aptamer, 200 nM;

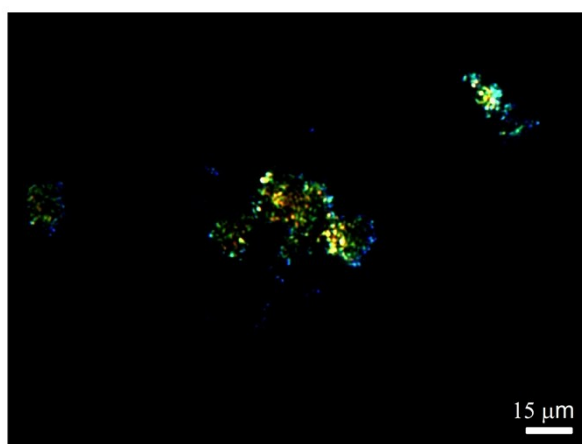

**Fig. S4** Semi-quantification of lysozyme concentration in human serum sample by the dark-field light scattering images of AgNPs on the MNPs-apt-lysozyme complex. Concentrations: aptamer, 200 nM; AgNPs, 11.04 pM. Human serum sample was diluted for 50 times.

**Table S1.** Comparison of different methods for lysozyme detection.

| Assay                                                                                                  | Principle                                                                                                                                  | Linear range                                                   | LOD         | Ref   |
|--------------------------------------------------------------------------------------------------------|--------------------------------------------------------------------------------------------------------------------------------------------|----------------------------------------------------------------|-------------|-------|
| Colorimetry                                                                                            | Peptidecapped gold nanoparticles (AuNPs) aggregation                                                                                       | 0.07-1.75 nM                                                   | 5.6 pM      | 1     |
|                                                                                                        | Light regulation of peroxidase activity by spiropyran functionalized carbon nanotubes                                                      | 30-500 nM                                                      | 30 nM       | 2     |
|                                                                                                        | Aptamer-induced positively charged AuNPs aggregation                                                                                       | 0.035-1.05 uM                                                  | 35 nM       | 3     |
|                                                                                                        | Lysozyme induced aggregation of HSA-AuNPs                                                                                                  | 0.1-1 uM                                                       | 50 nM       | 4     |
| Electrochemistry                                                                                       | Aptamer-antibody sandwich assay                                                                                                            | 5 fM-5 nM                                                      | 4.3 fM      | 5     |
|                                                                                                        | Iminodiacetic acid-copper ion complex (IDA-Cu) immobilized onto AuNPs-modified glassy carbon electrode as a novel electrochemical platform | 0.1pM-0.1 mM                                                   | 60 fM       | 6     |
|                                                                                                        | Faradic impedance aptasensor based on target-induced aptamer displacement                                                                  | 0.2-4.0 nM                                                     | 0.07 nM     | 7     |
|                                                                                                        | A three-way junction aptasensor based on target-induced conformational change                                                              | 0.2-100 nM                                                     | 0.2nM       | 8     |
|                                                                                                        | Target-induced release of aptamers and back-filling hybridization of the resulting single stranded DNAs                                    | 1.0-200 nM                                                     | 0.75 nM     | 9     |
|                                                                                                        | [Ru(bpy) <sub>2</sub> (dcbpy)NHS] labeling/aptamer-based biosensor with AuNPs amplification                                                | 0.1 pM-10 nM                                                   | 0.1 pM      | 10    |
|                                                                                                        | Fluorescence                                                                                                                               | CuInS <sub>2</sub> quantum dots and a cationic polyelectrolyte | 0.04-0.5 uM | 20 nM |
| Aptamer induced the aggregation of a perylene probe and decreased fluorescence                         |                                                                                                                                            | 0-10.5 nM                                                      | 70 pM       | 12    |
| Homogeneous fluorescence anisotropic sensing with FAM-aptamer                                          |                                                                                                                                            | 12.5-300 nM                                                    | 4.9 nM      | 13    |
| Cytochrome c could quench the fluorescence of FAM-aptamer                                              |                                                                                                                                            | 0-100 nM                                                       | 100 pM      | 14    |
| Displacing single-stranded DNA binding protein binding to a molecular beacon                           |                                                                                                                                            | 0-15 nM                                                        | 200 pM      | 15    |
| Fluorescence resonance energy transfer between an anionic conjugated polymer and a dye-labeled aptamer |                                                                                                                                            | 0-2.78 uM                                                      | 5.6 nM      | 16    |
| Aptamer can improve the fluorescence intensity of photoactive metalocyclodextrins                      |                                                                                                                                            | 0.1-0.5 uM                                                     | 48 pM       | 17    |
| Fluorescent resonant energy transfer biosensor between upconversion nanoparticles and TAMRA-aptamer    |                                                                                                                                            | 30-210 nM                                                      | 2.5 nM      | 18    |
| Exonuclease III-aided amplification assay                                                              |                                                                                                                                            | 8.75-70 nM                                                     | 5.6 nM      | 19    |

|                                          |                                                                                      |                                    |         |      |
|------------------------------------------|--------------------------------------------------------------------------------------|------------------------------------|---------|------|
|                                          | based on graphene oxide platform                                                     |                                    |         |      |
| Chemiluminescence                        | Magnetic molecularly imprinted polymers extraction                                   | 0.25-140 nM                        | 0.25 nM | 20   |
|                                          | Nicking endonuclease cleavage coupled nanoparticles CL probe signal amplification    | 1 pM-1 nM                          | 0.2 pM  | 21   |
|                                          | Magnetic molecularly imprinted nanoparticles                                         | 0.25-140 nM                        | 0.25 nM | 22   |
|                                          | Electrogenerated chemiluminescence aptasensor                                        | 0.64-640 nM                        | 0.12 nM | 23   |
| Surface-enhanced Raman scattering (SERS) | Polymerase assisted cross strand-displacement amplification                          | 0.01-10 pM                         | 5.8 fM  | 24   |
|                                          | Target-triggering multiple cycle amplification strategy based on a gold substrate    | 1 aM-1 pM                          | 1 aM    | 25   |
| Light scattering                         | AuNPs-based aptasensor                                                               | 0.2~4 nM,<br>0.3~6 nM,<br>0.6~8 nM | 0.1 nM  | 26   |
|                                          | Lysozyme induced AuNPs aggregation                                                   | 15-50 nM                           | 13.1 nM | 27   |
|                                          | Rayleigh light scattering spectroscopy of individual nanoplasmonic aptasensors       | 7 pM - 700 nM                      | 7 aM    | 28   |
|                                          | Magnetic nanoparticle-based aptasensor with strongly scattering silver nanoparticles | 0.4-30 nM                          | 0.1 nM  | Ours |

## References

1. H. Huang, Q. Zhang, J. Luo and Y. Zhao, *Anal Methods*, 2012, **4**, 3874-3878.
2. Y. Song, C. Xu, W. Wei, J. Ren and X. Qu, *Chem. Commun.*, 2011, **47**, 9083-9085.
3. J. Su, W. Zhou, Y. Xiang, R. Yuan and Y. Chai, *Chem. Commun.*, 2013, **49**, 7659-7661.
4. Y.-M. Chen, C.-J. Yu, T.-L. Cheng and W.-L. Tseng, *Langmuir*, 2008, **24**, 3654-3660.
5. C. Ocana, A. Hayat, R. Mishra, A. Vasilescu, M. del Valle and J. L. Marty, *Analyst*, 2015, **140**, 4148-4153.
6. A. Arabzadeh and A. Salimi, *Biosens. Bioelectron.* 2015, **74**, 270-276.
7. Y. Peng, D. Zhang, Y. Li, H. Qi, Q. Gao and C. Zhang, *Biosens. Bioelectron.* 2009, **25**, 94-99.
8. Y. Xia, S. Gan, Q. Xu, X. Qiu, P. Gao and S. Huang, *Biosens. Bioelectron.* 2013, **39**, 250-254.
9. Y. Xiang, X. Qian, B. Jiang, Y. Chai and R. Yuan, *Chem. Commun.*, 2011, **47**, 4733-4735.
10. J. Bai, H. Wei, B. Li, L. Song, L. Fang, Z. Lv, W. Zhou and E. Wang, *Chem-Asian J*, 2008, **3**, 1935-1941.
11. S. Y. Liu, W. D. Na, S. Pang, F. P. Shi and X. G. Su, *Analyst*, 2014, **139**, 3048-3054.
12. B. Wang and C. Yu, *Angew. Chem. Int. Ed.* , 2010, **49**, 1485-1488.
13. M. Zou, Y. Chen, X. Xu, H. Huang, F. Liu and N. Li, *Biosens. Bioelectron.* 2012, **32**, 148-154.
14. D. Liao, J. Chen, W. Li, Q. Zhang, F. Wang, Y. Li and C. Yu, *Chem. Commun.*, 2013, **49**, 9458-9460.
15. D. Tang, D. Liao, Q. Zhu, F. Wang, H. Jiao, Y. Zhang and C. Yu, *Chem. Commun.*, 2011, **47**, 5485-5487.
16. J. Wang and B. Liu, *Chem. Commun.*, 2009, 2284-2286.
17. F. Zhang, Y. Y. Zhao, H. Chen, X. H. Wang, Q. Chen and P. G. He, *Chem. Commun.*, 2015, **51**, 6613-6616.
18. H. Zhu, Y. Ding, A. Wang, X. Sun, X.-C. Wu and J.-J. Zhu, *J Mater Chem B*, 2015, **3**, 458-464.
19. C. Chen, J. Zhao, J. Jiang and R. Yu, *Talanta*, 2012, **101**, 357-361.
20. T. Jing, H. Xia, Q. Guan, W. Lu, Q. Dai, J. Niu, J.-M. Lim, Q. Hao, Y.-I. Lee, Y. Zhou and S. Mei, *Anal. Chim. Acta*, 2011, **692**, 73-79.
21. X. Hun, H. Chen and W. Wang, *Biosens. Bioelectron.* 2010, **26**, 248-254.
22. T. Jing, H. R. Du, Q. Dai, H. A. Xia, J. W. Niu, Q. L. Hao, S. R. Mei and Y. K. Zhou, *Biosens. Bioelectron.* , 2010, **26**, 301-306.
23. Y. Li, H. Qi, Q. Gao and C. Zhang, *Biosens. Bioelectron.* 2011, **26**, 2733-2736.
24. Y. Li, C. Lei, Y. Zeng, X. Ji and S. Zhang, *Chem. Commun.*, 2012, **48**, 10892-10894.
25. P. He, Y. Zhang, L. J. Liu, W. P. Qiao and S. S. Zhang, *Chem-Eur J*, 2013, **19**, 7452-7460.
26. X. Wang, Y. Xu, Y. Chen, L. Li, F. Liu and N. Li, *Anal Bioanal Chem* 2011, **400**, 2085-2091.
27. X. Wang, Y. Xu, X. Xu, K. Hu, M. Xiang, L. Li, F. Liu and N. Li, *Talanta*, 2010, **82**, 693-697.
28. P. L. Truong, S. P. Choi and S. J. Sim, *small*, 2013, **9**, 3485-3492.
